Muso *et al.* *Wars2* and adiposity

1 **A *Wars2* mutant mouse shows a sex and diet specific change in fat**  
2 **distribution, reduced food intake and depot-specific upregulation**  
3 **of WAT browning**

4  
5 Milan Mušo<sup>1</sup>, Liz Bentley<sup>1,2</sup>, Lucie Vizor<sup>2</sup>, Marianne Yon<sup>2</sup>, Keith Burling<sup>3</sup>, Peter Barker<sup>3</sup>,  
6 Louisa A K Zolkiewski<sup>1</sup>, Roger D Cox<sup>†\*1</sup>, Rebecca Dumbell<sup>†\*1,4</sup>

7  
8 <sup>1</sup>Mammalian Genetics Unit, MRC Harwell Institute, Oxfordshire, UK.

9 <sup>2</sup>Mary Lyon Centre at MRC Harwell, Oxfordshire, UK

10 <sup>3</sup>MRC Metabolic Diseases Unit, Mouse Biochemistry Laboratory, Cambridge, UK

11 <sup>4</sup>School of Science and Technology, Department of Biosciences, Nottingham Trent University,  
12 Nottingham, UK.

13

14 <sup>†</sup> *These authors share last authorship*

15

16

17

18

19

20 **Keywords:** WARS2, WHR, fat distribution, browning, GDF15, FGF21, food intake

21

22 **Competing Interests:** The authors declare no competing financial interests.

## 23 1. Abstract

24 **Background:** Increased waist-to-hip ratio (WHR) is associated with increased mortality and  
25 risk of type 2 diabetes and cardiovascular disease. The *TBX15-WARS2* locus has consistently  
26 been associated with increased WHR. Previous study of the hypomorphic *Wars2*<sup>V117L/V117L</sup>  
27 mouse model found phenotypes including severely reduced fat mass, and white adipose tissue  
28 (WAT) browning, suggesting *Wars2* could be a potential modulator of fat distribution and  
29 WAT browning.

30 **Methods:** To test for differences in browning induction across different adipose depots of  
31 *Wars2*<sup>V117L/V117L</sup> mice, we measured multiple browning markers of a 4-month old chow-fed  
32 cohort in subcutaneous and visceral WAT and brown adipose tissue (BAT). To explain  
33 previously observed fat mass loss, we also tested for the upregulation of plasma mitokines  
34 FGF21 and GDF15 and for differences in food intake in the same cohort. Finally, to test for  
35 diet-associated differences in fat distribution, we placed *Wars2*<sup>V117L/V117L</sup> mice on low-fat or  
36 high-fat diet (LFD, HFD) and assessed their body composition by Echo-MRI and compared  
37 terminal adipose depot weights at 6 months of age.

38 **Results:** The chow-fed *Wars2*<sup>V117L/V117L</sup> mice showed more changes in WAT browning marker  
39 gene expression in the subcutaneous inguinal WAT depot (iWAT) than in the visceral gonadal  
40 WAT depot (gWAT). These mice also demonstrated reduced food intake and elevated plasma  
41 FGF21 and GDF15, and mRNA from heart and BAT. When exposed to HFD, the  
42 *Wars2*<sup>V117L/V117L</sup> mice showed resistance to diet-induced obesity and a male and HFD-specific  
43 reduction of gWAT : iWAT ratio.

44 **Conclusion:** Severe reduction of *Wars2* gene function causes a systemic phenotype which  
45 leads to upregulation of FGF21 and GDF15, resulting in reduced food intake and depot-specific  
46 changes in browning and fat mass.

## 47      **2. Introduction**

48      Increased waist-to-hip ratio (WHR) is associated with increased mortality and risk of coronary  
49      heart disease, myocardial infarction and type 2 diabetes (Vazquez *et al.*, 2007; Snijder *et al.*,  
50      2003; Wang *et al.*, 2005; Canoy, 2008; Mason, Craig and Katzmarzyk, 2008; Myint *et al.*,  
51      2014; Emdin *et al.*, 2017; Peters, Bots and Woodward, 2018). The most recent meta-analysis  
52      identified 346 different loci associated with WHR adjusted for body mass index (WHRadjBMI)  
53      with most of the candidate genes being enriched in adipocytes and multiple fat depots (Pulit *et*  
54      *al.*, 2018).

55  
56      The *TBX15-WARS2* locus, which spans ~1Mb and includes genes *TBX15*, *WARS2* and regions  
57      downstream of *SPAG17*, is consistently associated with WHR across multiple meta-analyses  
58      (Heid *et al.*, 2010; Shungin *et al.*, 2015; Pulit *et al.*, 2018). Since the majority of SNPs in this  
59      region overlap the non-coding part of the genome, the effector genes remain to be identified  
60      (Maurano *et al.*, 2012; Mušo *et al.*, 2020). *WARS2* is a mitochondrial tryptophanyl-tRNA  
61      synthetase, recently associated with angiogenesis and brown adipose tissue metabolism (Wang  
62      *et al.*, 2016; Pravenec *et al.*, 2017). Expression of both *TBX15* and *WARS2* in subcutaneous  
63      adipose tissue was associated with multiple metabolic traits including BMI and Matsuda insulin  
64      sensitivity index (Civelek *et al.*, 2017). The GTEx database links the *TBX15-WARS2* locus risk  
65      SNPs to the expression of *WARS2* in multiple human tissues, but a few studies have also linked  
66      the locus to *TBX15* expression in adipose (Heid *et al.*, 2010; GTEx-Consortium, 2013; Civelek  
67      *et al.*, 2017).

68  
69      Our group has previously established a *Wars2*<sup>V117L/V117L</sup> mouse model where a N-ethyl-N-  
70      nitrosourea (ENU)-induced hypomorphic mutation causes defective splicing and results in only  
71      0-30% of the full-length protein remaining across different tissues (Agnew *et al.*, 2018).  
72      Homozygous *Wars2*<sup>V117L/V117L</sup> mice showed mitochondrial electron transport chain (ETC)  
73      complex deficiency in multiple tissues, hypertrophic cardiomyopathy, sensorineural hearing  
74      loss and failure to gain fat mass. Importantly, white adipose tissue (WAT) showed upregulation  
75      of mitochondria and browning markers such as uncoupling protein 1 (UCP1) and mRNA levels  
76      of cell death-inducing DNA fragmentation factor subunit alpha (DFFA)-like effector a (*Cidea*)  
77      and iodothyronine deiodinase 2 (*Dio2*) genes. On the other hand, the brown adipose tissue  
78      (BAT) was dysfunctional and showed reduced browning marker expression. Elevated serum  
79      fibroblast growth factor-21 (FGF21) and mRNA from heart, muscle and white adipose

## Muso *et al.* *Wars2* and adiposity

80 suggested a mechanism by which at least part of the browning in adipose tissue may be  
81 mediated systemically (Fisher *et al.*, 2012).

82

83 Another mitokine frequently co-induced with FGF21 in response to mitochondrial stress is  
84 growth/differentiation factor 15 (GDF15). GDF15 was previously reported to be an inducer of  
85 taste aversion and a suppressor of food intake by acting in the hindbrain where its receptor  
86 GDNF family receptor  $\alpha$ -like (GFRAL) is expressed (Patel *et al.*, 2019, Mullican *et al.*, 2017).  
87 We hypothesised that a possible elevation of GDF15 levels could be thus affecting food intake  
88 and in effect the fat mass in *Wars2*<sup>V117L/V117L</sup> mice.

89

90 In this follow-up study, we set out to explore whether WARS2 could be a regulator of white  
91 adipose browning and fat distribution. We initially tested whether the previously observed  
92 WAT browning effects in *Wars2*<sup>V117L/V117L</sup> mice differed between different depots and whether  
93 changes in FGF21, GDF15 and food intake are observed and thus could explain the failure to  
94 gain fat mass in the chow-fed mice. Given that human polymorphisms in the *TBX15-WARS2*  
95 locus are associated with a less severe reduction in *WARS2* expression (GTEx-Consortium,  
96 2013), we included heterozygous *Wars2*<sup>+/V117L</sup> mice in our study. We evaluated the effect of  
97 high- and low-fat diet challenge (HFD – 60% kcal fat, LFD – 10% kcal fat) on adiposity and  
98 tested for any diet and depot specific differences in fat mass loss.

99

100

### 101 **3. Materials and methods**

#### 102 **Animal models**

103 All mice used in this study were housed in the Mary Lyon Centre at MRC Harwell. Mice were  
104 kept and studied in accordance with UK Home Office legislation and local ethical guidelines  
105 issued by the Medical Research Council (Responsibility in the Use of Animals for Medical  
106 Research, July 1993; Home Office license 30/3146 and 30/3070). Procedures were approved  
107 by the MRC Harwell Animal Welfare and Ethical Review Board (AWERB). Mice were kept  
108 under controlled light (light 7am–7pm, dark 7pm–7am), temperature ( $21 \pm 2^\circ\text{C}$ ) and humidity  
109 ( $55 \pm 10\%$ ) conditions. They had free access to water (9–13 ppm chlorine) and were fed *ad*  
110 *libitum* on a commercial chow diet (SDS Rat and Mouse No. 3 Breeding diet, RM3, 3.6 kcal/g)  
111 unless stated otherwise. Mice were group housed unless stated otherwise and were randomised  
112 into sex-matched cages on weaning. Researchers were blinded to the genotype of mice until  
113 analysis of the data.

114

#### 115 **Experiment 1 - Molecular and hormonal investigation of *Wars2*<sup>V117L/V117L</sup> mice**

116 *Wars2*<sup>V117L/V117L</sup> mice were generated and genotyped as previously described (Potter *et al.*,  
117 2016; Agnew *et al.*, 2018). Tissues and plasma were collected in experiments previously  
118 described (Agnew *et al.*, 2018). Briefly, 4-month-old male and female *Wars2*<sup>V117L/V117L</sup> and  
119 *Wars2*<sup>+/+</sup> mice (n = 5-7) were humanely killed by terminal anaesthesia, and retro-orbital blood  
120 was collected into lithium-heparin microvette tubes (CB300, Sarstedt, Numbrecht, Germany).  
121 Death was confirmed by cervical dislocation and mice were then dissected and kidney, liver,  
122 muscle, heart, iWAT, gWAT and BAT collected. Tissues were directly placed in cryotubes  
123 and snap frozen in liquid nitrogen and samples were stored at  $-70^\circ\text{C}$  before subsequent  
124 analyses by qPCR.

125

#### 126 **Experiment 2 - Food intake measurements in *Wars2*<sup>V117L/V117L</sup> mice**

127 Four-week-old male and female *Wars2*<sup>V117L/V117L</sup>, *Wars2*<sup>+V117L</sup>, and *Wars2*<sup>+/+</sup> mice were pair-  
128 housed by genotype with *ad libitum* access to RM3 diet (n = 4 – 10 cages). Food was weighed  
129 twice a week until 16 weeks of age, and mice were weighed weekly. The mean weekly food  
130 intake per week per cage was calculated and cumulative food intake analysed.

131

Muso *et al.* *Wars2* and adiposity

### 132 **Experiment 3 - Body fat distribution in *Wars2*<sup>V117L/V117L</sup> mice on HFD**

133 We investigated body composition and fat distribution in male and female *Wars2*<sup>V117L/V117L</sup>,  
134 *Wars2*<sup>+/<sup>V117L</sup></sup>, and *Wars2*<sup>+/<sup>+</sup></sup> mice challenged with a high fat diet (HFD). Experimental cohort  
135 numbers were based on estimates made using GraphPad Statmate using gWAT : iWAT ratios  
136 from previous experiments. We generated three cohorts of males and females, which were  
137 weaned directly onto HFD (*Research Diets*, D12450J) or matched low-fat diet (LFD, *Research*  
138 *Diets*, D12492) (n = 9 – 22, 185 mice in total).

139  
140 Total body mass was measured every two weeks from 4 weeks of age on a scale calibrated to  
141 0.01g. Body composition of the mice was measured every two weeks using an Echo-MRI  
142 (EMR-136-M, Echo-MRI, Texas, USA). The readings were total fat mass (g) and total lean  
143 mass (g). At 24 weeks old, mice were humanely killed by cervical dislocation and tissues were  
144 dissected and individual fat depots were dissected and weighed: interscapular BAT (iBAT),  
145 interscapular WAT (isWAT), perirenal BAT (prBAT), perirenal WAT (prWAT), inguinal  
146 WAT (iWAT), gonadal WAT (gWAT), mesenteric WAT (mWAT), and epicardial WAT  
147 (cWAT). gWAT: iWAT ratio was calculated from these weights as an indicator of visceral :  
148 subcutaneous fat distribution as described in (Gray *et al.*, 2006).

### 149 **Experiment 4 - Body weight and composition in heterozygous knockout *Wars2*<sup>+/-</sup> mice** 150 **on HFD**

151 NIH KOMP *Wars2*<sup>+/-</sup> mice (*Wars2*<sup>tm1(KOMP)V1cg</sup>) obtained from the KOMP repository  
152 (<https://www.komp.org/>) were imported into our laboratory previously (Agnew *et al.*, 2018).  
153 Female *Wars2*<sup>+/-</sup> and *Wars2*<sup>+/<sup>+</sup></sup> mice were weaned directly onto HFD or LFD (n = 7-9, 32 mice)  
154 and maintained until 12 months when they were weighed, and body composition analysed by  
155 Echo-MRI (EMR-136-M, Echo-MRI, Texas, USA). At 12 months old, mice were humanely  
156 killed by cervical dislocation and tissues were dissected and individual fat depots were  
157 dissected and weighed as in experiment 3.

### 158 159 **Quantitative PCR**

160 Total RNA from adipose tissues (experiment 1) was extracted using the Direct-zol™ RNA  
161 MiniPrep Plus kit protocol (Zymo research, #R2071). RNA was reverse-transcribed using the  
162 SuperScript™ III Reverse Transcriptase Kit (ThermoFisher) to generate 2 µg of cDNA. mRNA  
163 gene expression was assayed using the TaqMan system (ThermoFisher) with the TaqMan FAM

## Muso *et al.* *Wars2* and adiposity

164 dye-labeled probes (Applied Biosystems, Invitrogen, U.S.A.) according to manufacturer  
165 protocols. Assays were carried out using an ABIPRISM 7500 Fast Real-Time PCR System  
166 (Applied Biosystems) and quantitation by the comparative  $C_T$  ( $\Delta\Delta C_T$ ) analysis. Data was  
167 normalised to a geometric mean of 2 house-keeping genes specific to each tissue.

168 A mouse GeNORM analysis (PrimerDesing) for 6-8 genes was used to determine the most  
169 stable house-keeping genes. Taqman probes used in this study: *Canx* (Mm00500330\_m1),  
170 *Rpl13a* (Mm01612986\_gH), *Wars2* (Mm04208965\_m1), *Ywhaz* (Mm01722325\_m1), *Cidea*  
171 (Mm0042554\_m1), *Cox7a1* (Mm00438297\_g1), *Dio2* (Mm00515664\_m1), *Ucp1*  
172 (Mm01244861\_m1), *Fgf21* (Mm00840165\_g1),  *$\beta$ -klotho* (Mm00502002\_m1), *Pgc1a*  
173 (Mm01208835\_m1), *Ppara* (Mm00440939\_m1), *Ppar $\gamma$*  (Mm01184322\_m1), *Prdm16*  
174 (Mm00712556\_m1).

175

### 176 **Mitochondrial DNA copy number assay**

177 Mitochondrial content in adipose tissue was assessed by ratio of mitochondrial DNA (mtDNA)  
178 to genomic DNA (gDNA) as assessed using qRT-PCR. Total DNA, which contains both gDNA  
179 and mtDNA, was extracted from adipose tissue (experiment 1) using the Dneasy Blood and  
180 Tissue Kit (Qiagen, # 69504). We amplified both the mouse genomic gene *Glyceraldehyde 3-*  
181 *phosphate dehydrogenase* (*Gapdh*) and mouse mitochondrial gene *Mitochondrially encoded*  
182 *NADH:Ubiquinone oxidoreductase core subunit 1* (*mt-Nd1*) as proxies for genomic and  
183 mitochondrial DNA, respectively. Quantitative PCR was performed with 10ng DNA per  
184 reaction and 5  $\mu$ M of each primer, using the Fast SYBR Green System on a ABIPRISM 7500  
185 Fast Real-Time PCR Machine (Applied Biosystems). All samples were run in technical  
186 triplicates. Primers: *mt-Nd1-Fw* (CCATTCGCGTTATTCTT), *mt-Nd1-Rv*  
187 (AAGTTGATCGTAACGGAAGC), *Gapdh-Fw* (CAAGGAGTAAGAAACCCTGGACC),  
188 *Gapdh-Rv* (CGAGTTGGGATAGGGCCTCT).

189

### 190 **Biochemical assays**

191 Plasma fibroblast growth factor-21 (FGF21) levels were measured in blood plasma using  
192 Quantikine ELISA Mouse/Rat FGF21 Immunoassay (Quantikine, # MF2100). Mouse  
193 growth/differentiation factor 15 (GDF15) was measured using an in-house microtitre plate-  
194 based two-site electrochemiluminescence immunoassay using the MesoScale Discovery assay  
195 platform (MSD, Rockville, Maryland, USA). GDF-15 antibodies and standards were from  
196 R&D Systems (DuoSet # DY6385 BioTechne: Abingdon, UK).

197

Muso *et al.* *Wars2* and adiposity

198 **Statistical analysis**

199 All statistical analyses were performed in Graph Pad Prism 9. Data outliers were identified  
200 using ROUT and omitted as indicated in each figure legend. Normality of distribution was  
201 evaluated using D'Agostino & Pearson normality test. Data was transformed where necessary  
202 in order to normalise their distribution prior to statistical analysis and details of the statistical  
203 tests used are described in each figure legend. Area under the curve for bodyweight, fat and  
204 lean mass was calculated in PRISM with Y=0 as a baseline. qPCR data was log-transformed  
205 and is shown as mean  $\pm$  SD for visualisation and statistical analysis.



## 206 4. Results

### 207 **Browning is increased in both subcutaneous and visceral WAT depots of *Wars2*<sup>V117L/V117L</sup>** 208 **mice on chow diet**

209 We set out to test whether browning effects previously observed in subcutaneous iWAT can  
210 also be observed in visceral gWAT, assessed by mRNA expression of a panel of browning and  
211 mitochondrial biogenesis gene markers in these mice at 4-months of age. In male iWAT of  
212 *Wars2*<sup>V117L/V117L</sup> mice, as expected, we found increased expression of browning genes: *Cidea*  
213 increased by  $0.61 \pm 0.25$  logFC (P = 0.0343), cytochrome c oxidase polypeptide 7A (*Cox7a*)  
214 by  $0.60 \pm 0.25$  logFC (P = 0.0414) and *Dio2* by  $0.93 \pm 0.30$  logFC (P = 0.0133) in (**Fig. 1A**).  
215 Male gWAT showed  $0.56 \pm 0.13$  logFC (P = 0.0025) and  $0.53 \pm 0.10$  logFC (P = 0.0006)  
216 increase in mRNA levels of both *Cidea* and the master regulator of mitochondrial biogenesis  
217 peroxisome proliferator-activated receptor gamma coactivator 1- $\alpha$  (*Pgc1 $\alpha$* ) in *Wars2*<sup>V117L/V117L</sup>  
218 mice (**Fig. 1B**). In female iWAT of *Wars2*<sup>V117L/V117L</sup> mice, *Cidea*, *Dio2*, *Pgc1 $\alpha$*  and *Ppara* were  
219 increased by  $0.49 \pm 0.15$ ,  $0.47 \pm 0.15$ ,  $0.50 \pm 0.12$  and  $0.33 \pm 0.11$  logFC, respectively (P =  
220 0.0122, 0.0130, 0.0026, 0.0179, respectively) (**Supp. Fig. 1A**). The expression of browning  
221 genes in female gWAT was highly variable and *Pgc1 $\alpha$*  was the only significantly upregulated  
222 gene  $0.51 \pm 0.17$  logFC (P = 0.0176) in *Wars2*<sup>V117L/V117L</sup> mice (**Supp. Fig. 1B**). In agreement  
223 with previous findings, BAT showed the reverse effect with reduced mitochondrial DNA  
224 content in both sexes (**Supp. Fig. 2A**) and reduced expression of browning marker gene  
225 expression in both sexes in *Wars2*<sup>V117L/V117L</sup> mice (**Supp. Fig. 2B-C**). We next assessed  
226 mitochondrial mass as another marker of browning. Using a qPCR assay targeting both mtDNA  
227 and gDNA genes, we observed a significant increase of  $0.43 \pm 0.08$  logFC and  $0.23 \pm 0.08$   
228 logFC in mtDNA : gDNA in male *Wars2*<sup>V117L/V117L</sup> iWAT (P = 0.0002) and gWAT (P =  
229 0.0264), respectively in *Wars2*<sup>V117L/V117L</sup> mice (**Fig. 1C**). No genotype driven difference was  
230 seen in female mice (**Supp. Fig. 1C**). Together this is evidence of increased WAT browning,  
231 observed on multiple levels (mRNA, protein, mtDNA) in both iWAT and gWAT depots in  
232 *Wars2*<sup>V117L/V117L</sup> mice with the specific effects differing between sexes and iWAT generally  
233 showing higher differences in fold change.

Muso *et al.* *Wars2* and adiposity

234

235 **Mitokines FGF21 and GDF15 are elevated in the *Wars2*<sup>V117L/V117L</sup> mice on chow diet.**

236 12-month old *Wars2*<sup>V117L/V117L</sup> mice were previously shown to have mitochondrial ETC  
237 complex deficiencies in multiple tissues and elevated plasma levels of the mitokine, FGF21  
238 which may at least partially explain the WAT browning. We thus decided to measure  
239 circulating FGF21 and the appetite-suppressing mitokine GDF15 in free fed 4-month old mice  
240 (Patel *et al.*, 2019). We observed an overall genotype effect (P = 0.0485) on FGF21 levels,  
241 with a 86% increase (P = 0.0364) in female *Wars2*<sup>V117L/V117L</sup> mice and a non-significant trend  
242 for increase in males (**Fig. 2A**). GDF15 was significantly increased in *Wars2*<sup>V117L/V117L</sup> mice  
243 of both sexes, with a 112% increase (P = 0.0014) in males and 158% increase (P = 0.0001) in  
244 females (**Fig. 2B**). We followed with a qPCR study of multiple tissues to show that *Fgf21*  
245 expression was elevated by 1.80 ± 0.13 mean difference of log<sub>10</sub>-fold change (logFC) ± (SE)  
246 (P = 0.0012), 0.38 ± 0.11 logFC (P = 0.0055), 0.47 ± 0.16 logFC (P = 0.0157), 0.41 ± 0.18  
247 logFC (P = 0.0447) in the heart, BAT, muscle and kidney of *Wars2*<sup>V117L/V117L</sup> mice respectively  
248 (**Fig. 2C**). *Gdf15* was elevated by 0.66 ± 0.09 of logFC (P<0.0001) and 0.84 ± 0.12 logFC  
249 (P<0.0001) in the heart and BAT, respectively (**Fig. 2D**). We also tested for changes in *Atf4*  
250 levels, one of the upstream regulators of *Gdf15* and *Fgf21*, but found no difference in any of  
251 the tissues (**Supp. Fig. 3**).

252

253 **Food intake is reduced in *Wars2*<sup>V117L/V117L</sup> mice on a chow diet**

254 We hypothesised that the elevated GDF15 levels may be contributing to reduced food intake  
255 in *Wars2*<sup>V117L/V117L</sup> mice. To test an effect on food intake, we set up an independent cohort of  
256 pair-housed mice on regular RM3 chow diet. Male *Wars2*<sup>V117L/V117L</sup> mice showed reduced  
257 cumulative food intake compared to wild-type mice already from the first timepoint at 7  
258 weeks of age (P = 0.045) (**Fig. 3A-B**). Female *Wars2*<sup>V117L/V117L</sup> mice showed significantly  
259 lower food intake from 10 weeks onwards (P = 0.0148). At 14 weeks of age, the male and  
260 female cumulative food intake was 17% (P = 0.0016) and 8.4% lower than wild-type (P =  
261 0.0020), respectively (**Fig. 3A-B**). This is thus likely to have contributed to the lower  
262 bodyweight seen in these mice (**Fig. 3C-D**).

263

264 **Homozygous *Wars2*<sup>V117L/V117L</sup> mice fail to gain fat mass due to growth and high-fat diet**

265 In data from a small cohort of 6-month old *Wars2*<sup>V117L/V117L</sup> males we previously showed a  
266 trend towards increased ratio of gWAT : iWAT mass (Agnew *et al.*, 2018). To investigate  
267 whether an altered diet could reveal a fat distribution phenotype or whether it would alleviate

Muso *et al.* *Wars2* and adiposity

268 the failure to gain fat mass found in these mice, *Wars2*<sup>V117L/V117L</sup>, *Wars2*<sup>+V117L</sup> and *Wars2*<sup>+/+</sup>  
269 mice were placed on HFD and matched LFD. As expected, HFD increased body weight and  
270 fat mass in wild-type *Wars2*<sup>+/+</sup> (week 24, males: P < 0.0001, P < 0.0001; females: P < 0.0001,  
271 P < 0.0001, respectively) and heterozygous *Wars2*<sup>+V117L</sup> mice (week 24, males: P = 0.0363, P  
272 < 0.0001, females: P < 0.0001, P < 0.0001, respectively). However, no significant effect of  
273 HFD on body weight was observed in *Wars2*<sup>V117L/V117L</sup> mice of either sex (**Fig. 4A-B, Fig. 5A-**  
274 **B**). On LFD, significant bodyweight differences between wild-type and *Wars2*<sup>V117L/V117L</sup> were  
275 observed and persisted from 14 (P = 0.0126) and 16 weeks of age (P = 0.0176) for males and  
276 females, respectively. On a HFD, significance was reached earlier, at 6 (P = 0.0016) and 12  
277 (P < 0.0001) weeks of age, respectively. Similar effects were observed between wildtype and  
278 homozygous mice for fat mass, which was significant from 6 and 12 weeks (male) and 10 and  
279 16 weeks (female), six weeks earlier on HFD than on LFD respectively (**Fig. 4C-D, Fig. 5C-**  
280 **D**). Significant differences were also observed in the lean mass of *Wars2*<sup>V117L/V117L</sup> mice, but  
281 these were of a smaller magnitude (**Fig. 4E-F, Fig. 5E-F**). When analysed over the time course  
282 using area under curve, these differences were maintained (**Supplementary Table 1**). In  
283 summary, most of the weight differences in *Wars2*<sup>V117L/V117L</sup> mice were due to the reduction in  
284 fat mass and administering a high-fat diet exacerbated these differences.

285  
286 For all 3 measures, heterozygous *Wars2*<sup>+V117L</sup> mice also showed significant differences to  
287 *Wars2*<sup>V117L/V117L</sup> mice at an earlier age than for wild type mice (**Fig. 4A-F, Fig. 5A-F**). A  
288 significant increase in bodyweight (P = 0.0476, P = 0.0416) and fat mass (P = 0.0418, P =  
289 0.0430) of *Wars2*<sup>+V117L</sup> females on HFD was observed compared to wild-type mice at 6 and 8  
290 weeks of age respectively, but this change did not persist in later timepoints. In line with this,  
291 12-month-old heterozygous female knockout *Wars2*<sup>+/-</sup> mice did not show any differences in  
292 body weight or composition on either diet (**Supp. Fig. 6**). In summary, we did not observe any  
293 reproducible differences between the heterozygous *Wars2*<sup>+V117L</sup> or *Wars2*<sup>+/-</sup> mice and the wild-  
294 type mice.

295  
296 ***Wars2*<sup>V117L/V117L</sup> mice show reduction in the weights of multiple fat depots and a HFD and**  
297 **male specific elevation in gWAT : iWAT ratio.**

298 Since the majority of the weight differences in the *Wars2*<sup>V117L/V117L</sup> mice could be explained by  
299 fat mass, we next evaluated differences in fat distribution by weighing fat depots from 24 week  
300 old mice, and we considered the ratio of gWAT : iWAT mass, (**Fig. 6 , Supp. Fig. 4, Supp.**  
301 **Fig. 5**). Indeed, almost all fat depots weighed less in *Wars2*<sup>V117L/V117L</sup> compared to wild-type or

Muso *et al.* *Wars2* and adiposity

302 heterozygous mice. The only exceptions were male HFD gWAT, female HFD perirenal BAT  
303 and female LFD perirenal WAT which did not differ from *Wars2*<sup>+/+</sup> or *Wars2*<sup>+/*V117L*</sup>. The lack  
304 of weight change in male *Wars2*<sup>*V117L/V117L*</sup> gWAT on HFD together with the  $1.372 \pm 0.1755$ g  
305 lower iWAT weight (P<0.0001) resulted in an increased gWAT : iWAT ratio (P<0.0001),  
306 indicating higher visceral to subcutaneous fat ratio (**Fig. 6A,C,E**) Interestingly, no such trend  
307 was replicated in females where both iWAT and gWAT depot weights were reduced, by  $1.508$   
308  $\pm 0.2398$ g (P<0.001) and  $1.684 \pm 0.2521$ g (P<0.001), respectively (**Fig. 6B,D,F**). No  
309 significant differences were observed between the heterozygous and wild-type mice for any of  
310 the fat depots apart for male iWAT on a LFD (P<0.05). Similarly, fat depots of 12-month-old  
311 female heterozygous *Wars2*<sup>+/-</sup> mice in a separate cohort, did not show any significant  
312 differences (**Supp. Fig. 7**). This demonstrates that *Wars2*<sup>*V117L/V117L*</sup> mice have much lower fat  
313 mass which is unequally shared by different fat depots and results in male and HFD-specific  
314 increase in gWAT : iWAT ratio.

315

316

## 317 **5. Discussion**

318 We assessed fat depot differences in browning and showed that the magnitude of browning  
319 effects is greater in iWAT than in gWAT of chow-fed 4-month-old *Wars2*<sup>V117L/V117L</sup> mice. This  
320 agrees with previous research which showed that gWAT has low browning marker expression  
321 and a very low browning capacity compared to iWAT (de Jong *et al.*, 2015; Zuriaga *et al.*,  
322 2017). Our findings suggest that the adipose phenotypes in *Wars2*<sup>V117L/V117L</sup> mice are driven  
323 systemically, secondary to a severe mitochondrial dysfunction in the heart, BAT and muscle.  
324 Firstly, we confirmed the upregulation of FGF21, an established inducer of WAT browning  
325 (Fisher *et al.*, 2012; Agnew *et al.*, 2018). Secondly, we showed higher plasma GDF15 in these  
326 mice which may contribute to the observed lower food intake that thus contributed to the  
327 reduced bodyweight and fat mass, as shown in other models of mitochondrial disease (Chung  
328 *et al.*, 2017).

329  
330 We have shown that *Wars2*<sup>V117L/V117L</sup> mice fail to gain fat mass also when challenged with a  
331 HFD, accompanied by a male and HFD-specific upregulation of gWAT : iWAT ratio. This was  
332 likely driven by the lower mass of iWAT and the relatively unchanged visceral gWAT on HFD.  
333 In general, all other male visceral depots showed a reduction of fat mass in male  
334 *Wars2*<sup>V117L/V117L</sup> mice. It would be interesting to extend these observations using other  
335 methods, such as small animal X-ray computed tomography (CT) system, that could accurately  
336 verify the effect on overall fat distribution over time (Sasser *et al.*, 2012). This male-specific  
337 effect is in line with sexual dimorphism which is an established feature of fat distribution (Pulit,  
338 Karaderi and Lindgren, 2017). In fact, the *TBX15-WARS2* locus also contains an independent  
339 male-specific WHRadjBMI-association signal (Shungin *et al.*, 2015). Further study will be  
340 required to explain the diet specificity. However, HFD was previously shown to induce  
341 browning and it could thus potentiate the depot-specific differences observed in chow-fed  
342 animals and thus contribute to HFD-specific fat mass loss seen in WAT and not gWAT (García-  
343 Ruiz *et al.*, 2015).

344  
345 Is it possible that a similar mechanism relating mitochondrial failure in the heart and other  
346 tissues together with WAT browning might drive the WHR signal in humans? Indeed, rare  
347 variants in genes of the mitochondrial genomes and in another member of the *ARS2* family,  
348 *DARS2*, have all been associated with WHR (Justice *et al.*, 2019). Furthermore, in the Common  
349 Metabolic Diseases Knowledge Portal, the *TBX15-WARS2* locus is associated with

## Muso *et al.* *Wars2* and adiposity

350 cardiovascular traits such as stroke severity and peripheral vascular disease in people with type  
351 2 diabetes (cmdgenkp.org, no date a), whilst variants in the *WARS2* gene are linked to diastolic  
352 blood pressure (cmdgenkp.org, no date b). This suggests that a systemic mechanism could  
353 explain the WHR GWAS association in humans.

354  
355 In conclusion, we have shown that a hypomorphic mutation in the *Wars2* gene causes a severe  
356 failure to gain body mass and results in changes to fat distribution in male mice on a HFD. We  
357 also reveal differences in browning propensity of different WAT depots and elevation of  
358 FGF21 and GDF15 which likely partly explain some of these phenotypes. These data support  
359 a potential functional role for *WARS2* in the WHRadjBMI *TBX15-WARS2* locus, which could  
360 be further investigated in human studies where *WARS2* expression varies by genotype.

361

### 362 **Conflict of Interest**

363 The authors declare that they have no known competing financial or personal interests that  
364 could have appeared to influence the work reported in this paper.

365

### 366 **Author Contributions**

367 MM, RDC and RD designed and supervised the experiments, analysed data, prepared figures,  
368 and wrote the manuscript with input from all authors. MM carried out the molecular studies  
369 and body composition measurements. Food intake analysis was carried out by LB, MM and  
370 LV. Cohorts were managed by LB and LV. Fat depot weight measurements were performed  
371 by MY, EF, HN, RD and MM. LZ assisted with molecular studies. KB and PB carried out the  
372 GDF15 ELISAs.

### 373 **Funding**

374 This work was funded by the Medical Research Council (MC\_U142661184). MM was  
375 funded by an MRC Doctoral Training studentship. GDF15 assays were conducted at the  
376 MRC MDU Mouse Biochemistry Laboratory (MC\_UU\_00014/5).

377

378

### 379 **Acknowledgements**

380 We thank Emily File in the MLC for excellent technical assistance.

Muso *et al.* *Wars2* and adiposity

## 381 **Contribution to the Field**

382 Increased waist-to-hip ratio is associated with increased mortality and risk of coronary heart  
383 disease, myocardial infarction and type 2 diabetes. Although multiple theories exist to explain  
384 these associations, it is not yet certain why altered fat distribution would increase disease risk  
385 and whether targeting some of its molecular pathways could be utilised for disease prevention.  
386 Large genome wide association studies have uncovered hundreds of genomic loci, but for most  
387 of these, the causal gene is largely unknown. In this study, we have tested one candidate gene  
388 *WARS2* in the *TBX15/WARS2* locus by studying a mouse model with a damaging mutation in  
389 this gene. This mouse model has been previously shown to fail to gain fat mass and showed a  
390 complex phenotype with cardiomyopathy and increased white adipose tissue browning. Here,  
391 for the first time we also show that these mice show a diet and sex specific difference in fat  
392 distribution and thus implicate *WARS2* as a potential modulator of fat distribution. Since coding  
393 mutations in other mitochondrial protein genes have been associated with waist-to-hip ratio,  
394 this finding strengthens the link between mitochondrial function and adipose biology.  
395

## References

- 396 Agnew, T. *et al.* (2018) ‘A *Wars2* Mutant Mouse Model Displays OXPHOS Deficiencies and  
397 Activation of Tissue-Specific Stress Response Pathways.’, *Cell reports*. United States,  
398 25(12), pp. 3315–3328.e6. doi: 10.1016/j.celrep.2018.11.080.
- 399 Canoy, D. (2008) ‘Distribution of body fat and risk of coronary heart disease in men and  
400 women’, *Curr Opin Cardiol*. 2008/10/03, 23(6), pp. 591–598. doi:  
401 10.1097/HCO.0b013e328313133a.
- 402 Chung, H. K. *et al.* (2017) ‘Growth differentiation factor 15 is a myomitokine governing  
403 systemic energy homeostasis’, *Journal of Cell Biology*. Rockefeller University Press,  
404 216(1), pp. 149–165. doi: 10.1083/jcb.201607110.
- 405 Civelek, M. *et al.* (2017) ‘Genetic Regulation of Adipose Gene Expression and Cardio-  
406 Metabolic Traits’, *American Journal of Human Genetics*, 100(3), pp. 428–443. doi:  
407 10.1016/j.ajhg.2017.01.027.
- 408 cmdgenkp.org (no date a) *Common Metabolic Diseases Knowledge Portal. TBX15-WARS2*  
409 *locus*.
- 410 cmdgenkp.org (no date b) *Common Metabolic Diseases Knowledge Portal. WARS2*.  
411 Available at: <https://hugeamp.org/gene.html?gene=WARS2> (Accessed: 27 June 2021).
- 412 Emdin, C. A. *et al.* (2017) ‘Genetic association of waist-to-hip ratio with cardiometabolic  
413 traits, type 2 diabetes, and coronary heart disease’, *JAMA - Journal of the American*  
414 *Medical Association*. American Medical Association, 317(6), pp. 626–634. doi:  
415 10.1001/jama.2016.21042.
- 416 Fisher, F. F. *et al.* (2012) ‘FGF21 regulates PGC-1 $\alpha$  and browning of white adipose tissues in  
417 adaptive thermogenesis’, *Genes and Development*, 26(3), pp. 271–281. doi:  
418 10.1101/gad.177857.111.
- 419 García-Ruiz, E. *et al.* (2015) ‘The intake of high-fat diets induces the acquisition of brown  
420 adipocyte gene expression features in white adipose tissue’, *International Journal of*  
421 *Obesity*, 39(11), pp. 1619–1629. doi: 10.1038/ijo.2015.112.
- 422 Gray, S. L. *et al.* (2006) ‘Leptin deficiency unmasks the deleterious effects of impaired  
423 peroxisome proliferator-activated receptor gamma function (P465L PPARgamma) in  
424 mice’, *Diabetes*, 55(October), pp. 2669–2677. doi: 10.2337/db06-0389.
- 425 GTEx-Consortium (2013) ‘The Genotype-Tissue Expression (GTEx) project’, *Nat Genet*.  
426 2013/05/30, 45(6), pp. 580–585. doi: 10.1038/ng.2653.
- 427 Heid, I. M. *et al.* (2010) ‘Meta-analysis identifies 13 new loci associated with waist-hip ratio  
428 and reveals sexual dimorphism in the genetic basis of fat distribution’, *Nat Genet*.  
429 2010/10/12, 42(11), pp. 949–960. doi: 10.1038/ng.685.
- 430 de Jong, J. M. A. *et al.* (2015) ‘A stringent validation of mouse adipose tissue identity  
431 markers.’, *American journal of physiology. Endocrinology and metabolism*. United  
432 States, 308(12), pp. E1085–105. doi: 10.1152/ajpendo.00023.2015.
- 433 Justice, A. E. *et al.* (2019) ‘Protein-coding variants implicate novel genes related to lipid  
434 homeostasis contributing to body-fat distribution’, *Nature Genetics*, 18. doi:  
435 10.1038/s41588-018-0334-2.
- 436 Mason, C., Craig, C. L. and Katzmarzyk, P. T. (2008) ‘Influence of central and extremity  
437 circumferences on all-cause mortality in men and women’, *Obesity (Silver Spring)*.  
438 2008/10/18, 16(12), pp. 2690–2695. doi: 10.1038/oby.2008.438.
- 439 Maurano, M. T. *et al.* (2012) ‘Systematic localization of common disease-associated  
440 variation in regulatory DNA’, *Science*. 2012/09/08, 337(6099), pp. 1190–1195. doi:  
441 10.1126/science.1222794.
- 442 Mullican, S. E. *et al.* (2017) ‘GFRAL is the receptor for GDF15 and the ligand promotes  
443 weight loss in mice and nonhuman primates.’, *Nature medicine*. United States, 23(10),



Muso *et al.* Wars2 and adiposity

- 444 pp. 1150–1157. doi: 10.1038/nm.4392.
- 445 Mušo, M. *et al.* (2020) ‘A lead candidate functional single nucleotide polymorphism within  
446 the WARS2 gene associated with waist-hip-ratio does not alter RNA stability’,  
447 *Biochimica et Biophysica Acta - Gene Regulatory Mechanisms*. Elsevier B.V.,  
448 1863(11). doi: 10.1016/j.bbagr.2020.194640.
- 449 Myint, P. K. *et al.* (2014) ‘Body fat percentage, body mass index and waist-to-hip ratio as  
450 predictors of mortality and cardiovascular disease’, *Heart*. BMJ Publishing Group,  
451 100(20), pp. 1613–1619. doi: 10.1136/heartjnl-2014-305816.
- 452 Patel, S. *et al.* (2019) ‘GDF15 Provides an Endocrine Signal of Nutritional Stress in Mice and  
453 Humans’, *Cell Metabolism*, 29(3), pp. 707–718.e8. doi:  
454 <https://doi.org/10.1016/j.cmet.2018.12.016>.
- 455 Peters, S. A. E., Bots, S. H. and Woodward, M. (2018) ‘Sex Differences in the Association  
456 Between Measures of General and Central Adiposity and the Risk of Myocardial  
457 Infarction: Results From the UK Biobank.’, *Journal of the American Heart Association*.  
458 England, 7(5). doi: 10.1161/JAHA.117.008507.
- 459 Potter, P. K. *et al.* (2016) ‘Novel gene function revealed by mouse mutagenesis screens for  
460 models of age-related disease’, *Nature Communications*. The Author(s), 7, p. 12444.  
461 Available at: <https://doi.org/10.1038/ncomms12444>.
- 462 Pravenec, M. *et al.* (2017) ‘Mutant Wars2 gene in spontaneously hypertensive rats impairs  
463 brown adipose tissue function and predisposes to visceral obesity.’, *Physiological  
464 research*. Czech Republic, 66(6), pp. 917–924.
- 465 Pulit, S. L. *et al.* (2018) ‘Meta-analysis of genome-wide association studies for body fat  
466 distribution in 694,649 individuals of European ancestry.’, *Human molecular genetics*.  
467 England. doi: 10.1093/hmg/ddy327.
- 468 Pulit, S. L., Karaderi, T. and Lindgren, C. M. (2017) ‘Sexual dimorphisms in genetic loci  
469 linked to body fat distribution’, *Bioscience Reports*, 37(1), p. BSR20160184. doi:  
470 10.1042/BSR20160184.
- 471 Sasser, T. A. *et al.* (2012) ‘Segmentation and measurement of fat volumes in murine obesity  
472 models using X-ray computed tomography’, *Journal of visualized experiments : JoVE*.  
473 MyJove Corporation, (62), pp. e3680–e3680. doi: 10.3791/3680.
- 474 Shungin, D. *et al.* (2015) ‘New genetic loci link adipose and insulin biology to body fat  
475 distribution’, *Nature*. 2015/02/13, 518(7538), pp. 187–196. doi: 10.1038/nature14132.
- 476 Snijder, M. B. *et al.* (2003) ‘Associations of hip and thigh circumferences independent of  
477 waist circumference with the incidence of type 2 diabetes: the Hoorn Study’, *Am J Clin  
478 Nutr*. 2003/04/30, 77(5), pp. 1192–1197.
- 479 Vazquez, G. *et al.* (2007) ‘Comparison of Body Mass Index, Waist Circumference, and  
480 Waist/Hip Ratio in Predicting Incident Diabetes: A Meta-Analysis’. *Epidemiol Rev*.  
481 29:115-28. doi: 10.1093/epirev/mxm008.
- 482 Wang, M. *et al.* (2016) ‘Wars2 is a determinant of angiogenesis’, *Nat Commun*. 2016/07/09,  
483 7, p. 12061. doi: 10.1038/ncomms12061.
- 484 Wang, Y. *et al.* (2005) ‘Comparison of abdominal adiposity and overall obesity in predicting  
485 risk of type 2 diabetes among men’, *Am J Clin Nutr*. 2005/03/10, 81(3), pp. 555–563.
- 486 Zuriaga, M. A. *et al.* (2017) ‘Humans and Mice Display Opposing Patterns of “Browning”  
487 Gene Expression in Visceral and Subcutaneous White Adipose Tissue Depots’,  
488 *Frontiers in Cardiovascular Medicine*, 4(May), pp. 1–5. doi:  
489 10.3389/fcvm.2017.00027.
- 490

491 **Figures**

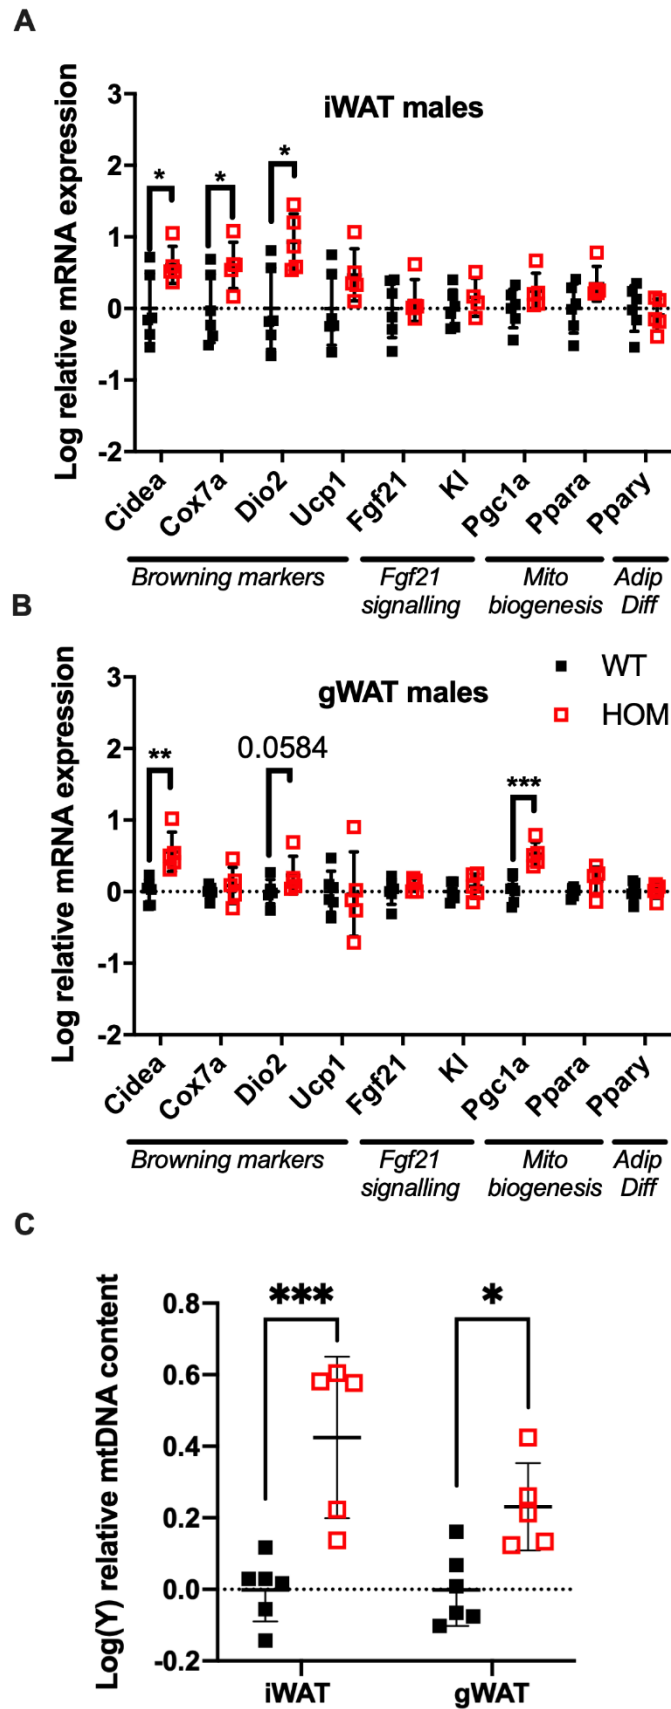

492

493 **Fig. 1**

Muso *et al.* *Wars2* and adiposity

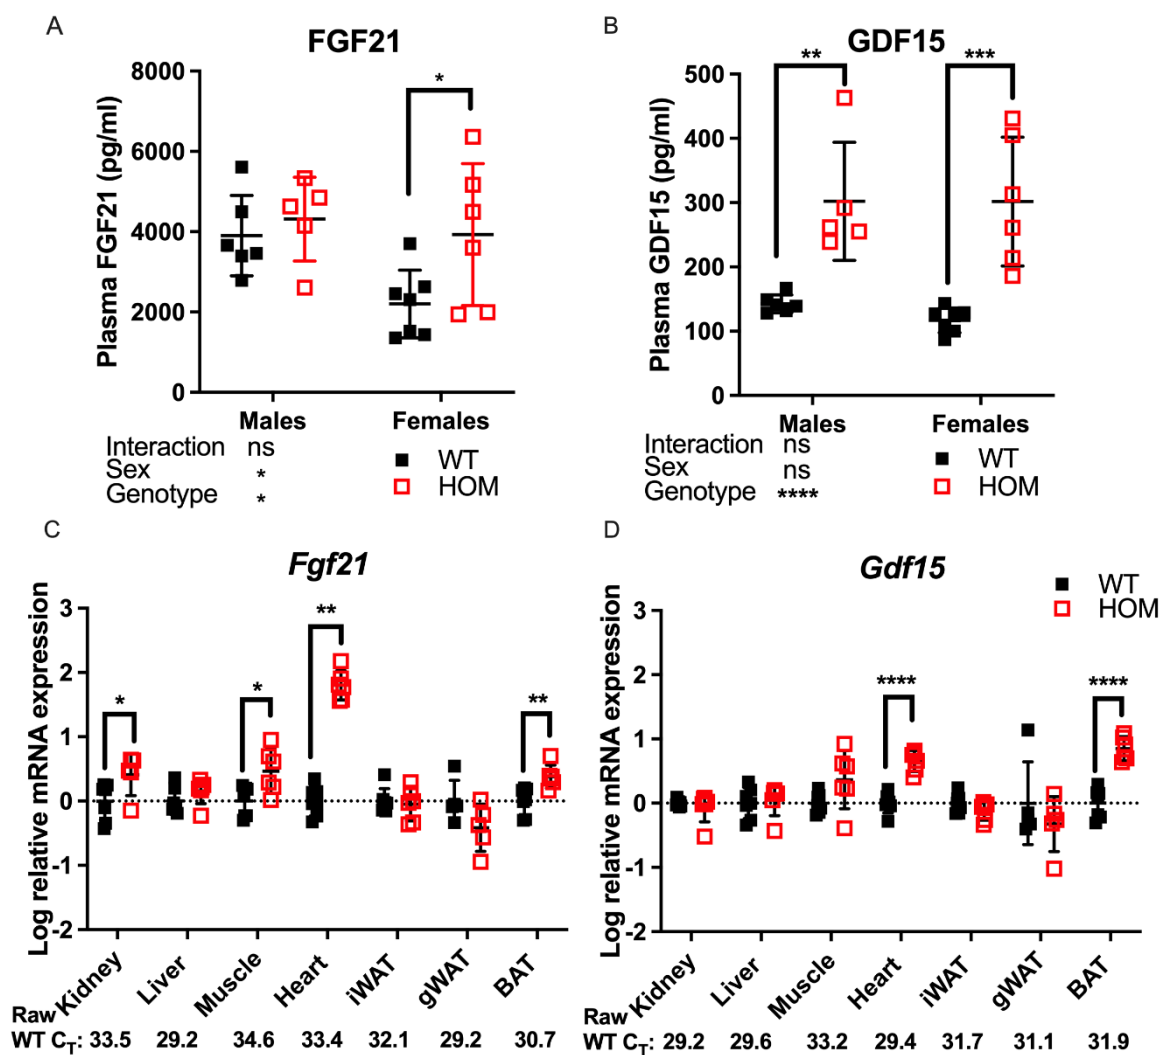

494 Fig. 2

Muso *et al.* *Wars2* and adiposity

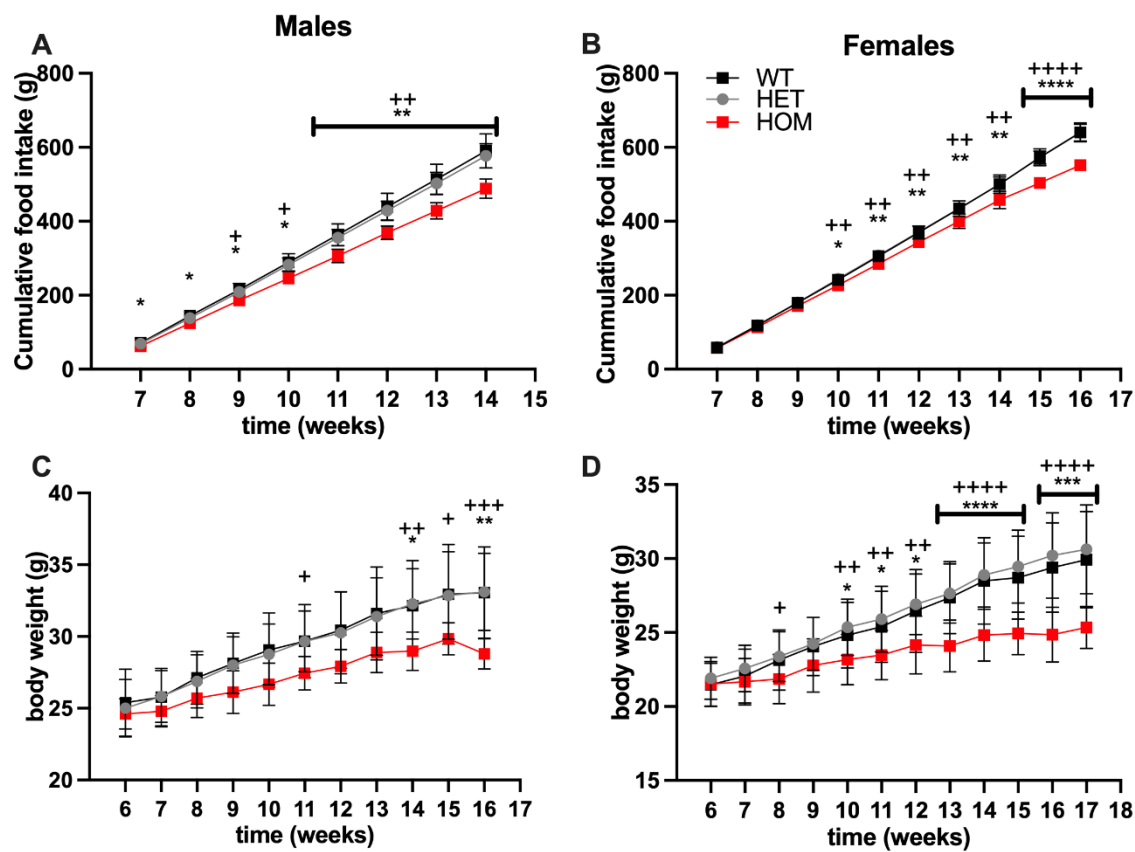

495 Fig. 3

Muso *et al.* *Wars2* and adiposity

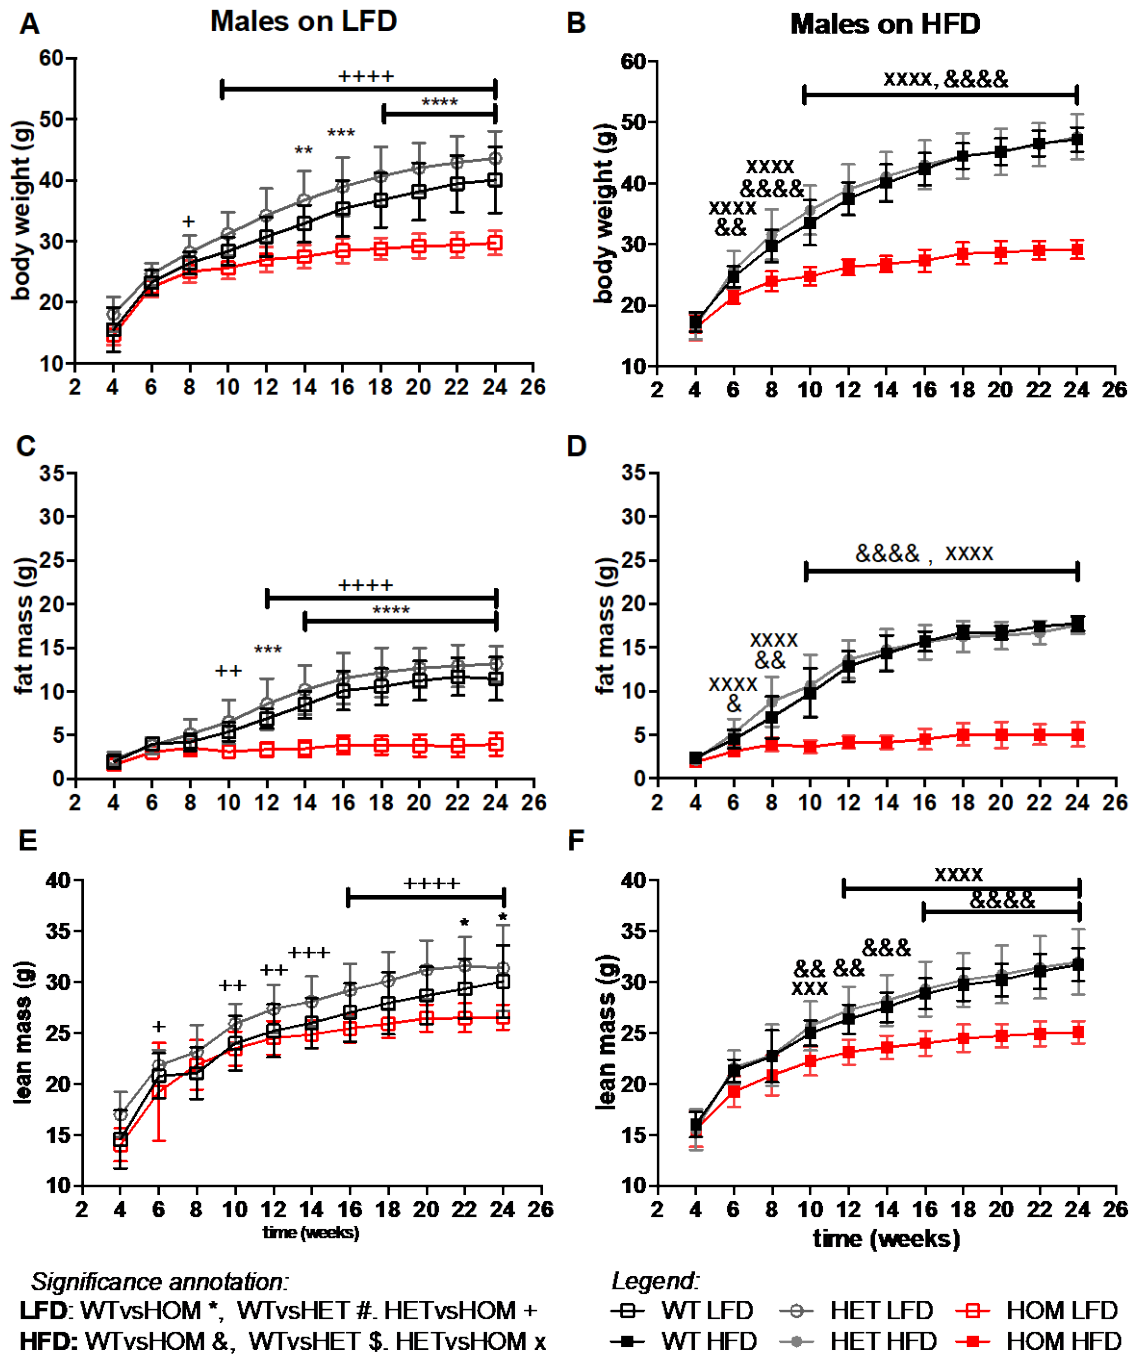

496 Fig. 4

Muso *et al.* *Wars2* and adiposity

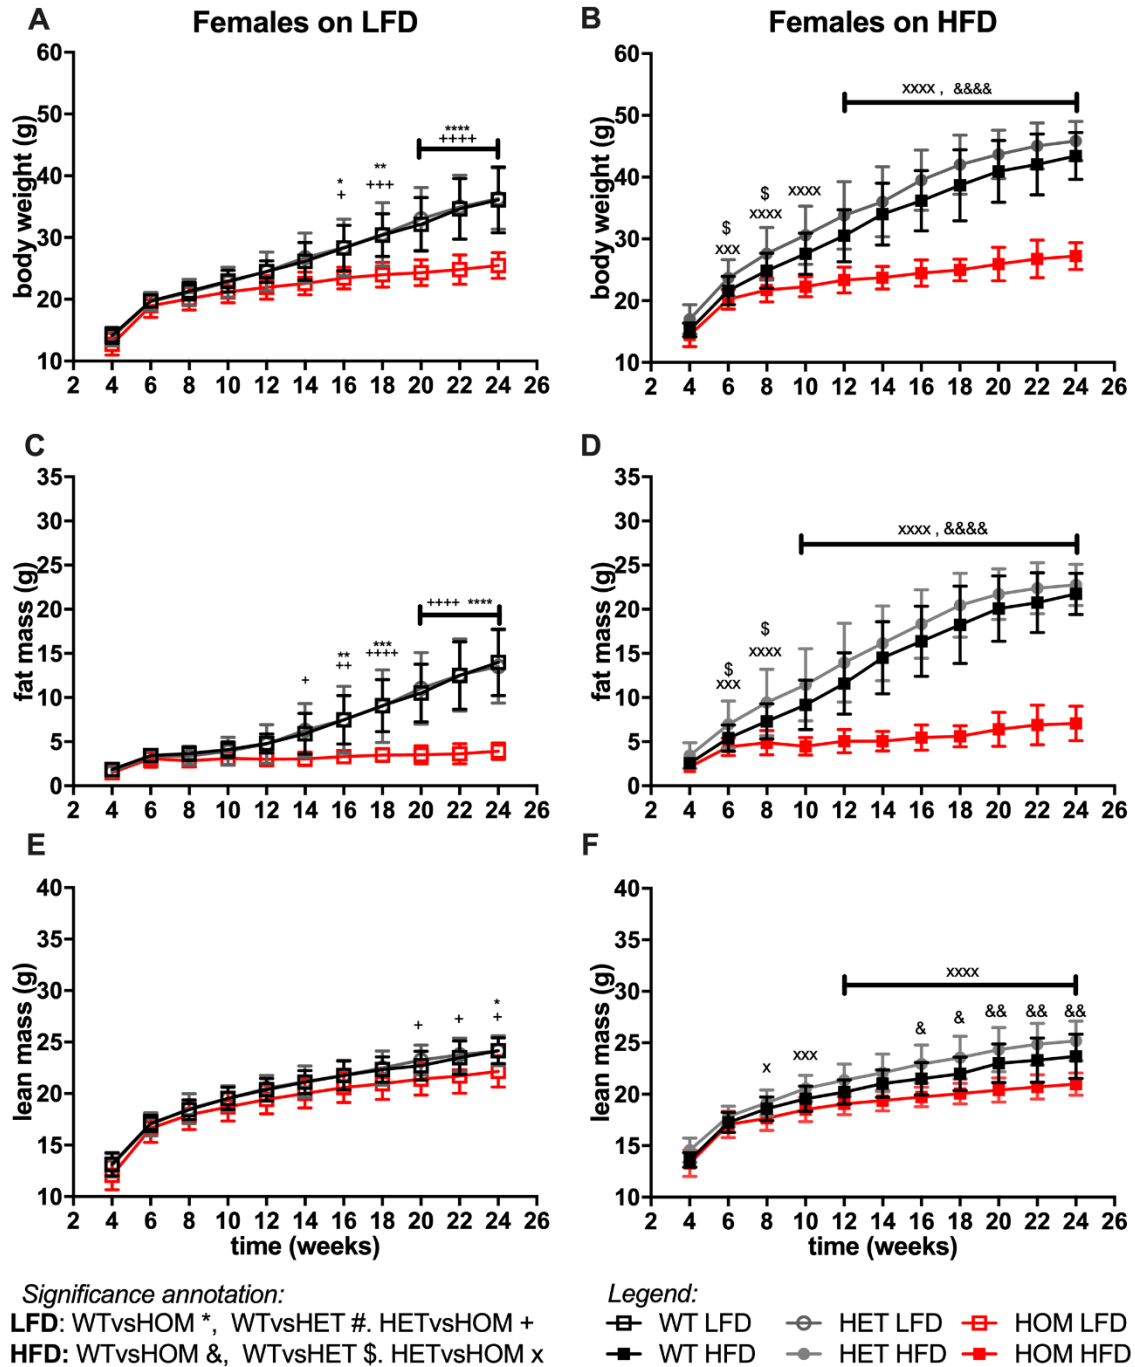

497 Fig. 5

Muso *et al.* *Wars2* and adiposity

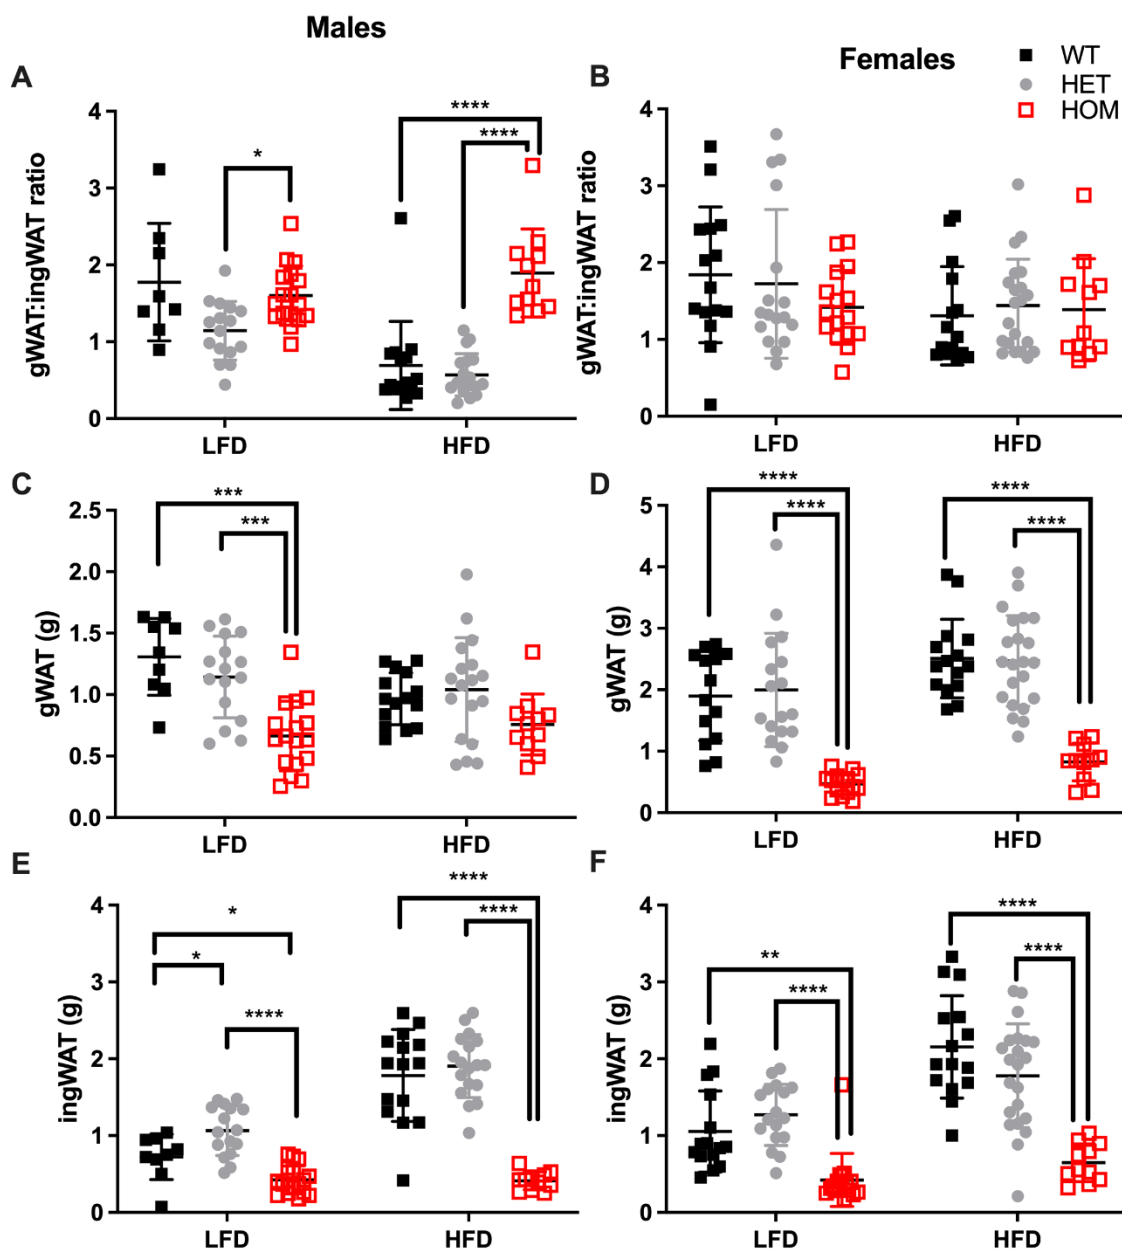

498 Fig. 6

## 499 **Figure captions**

500

501 **Fig. 7 Increased browning in inguinal WAT (iWAT) and gonadal WAT (gWAT) of 4-**  
502 **month old male *Wars2*<sup>V117L/V117L</sup> mice.** (A,B) Relative expression of browning, Fgf21  
503 signalling, mitochondrial biogenesis and adipose differentiation markers in iWAT and gWAT,  
504 respectively. Normalised to geometric mean of *Canx* and *Ywhaz*. Data was log-transformed  
505 and assessed by unpaired t-test or Mann-Whitney test (iWAT for *Dio2* and *Fgf21*) based on  
506 their distribution, n = 6 and 5 wildtype and homozygotes respectively in iWAT and gWAT.  
507 (C) qPCR analysis of *mt-Nd1:Gapdh* ratio signifying mitochondrial : genomic DNA (mtDNA  
508 : gDNA) ratio. 2-way ANOVA with post-hoc comparison of genotypes, n = 5. All data shown  
509 as mean ± SD.

510

511 **Fig. 8 GDF15 and FGF21 levels are elevated in 4-month old *Wars2*<sup>V117L/V117L</sup> mouse**  
512 **plasma.** ELISA analysis of FGF21 (A) and GDF15 (B) levels in males (n = 5-6) and females  
513 (n = 6-7). Analysis by 2-way ANOVA followed by post-hoc Sidak multiple comparison. qPCR  
514 analysis of *Fgf21* (C) and *Gdf15* (D) levels in multiple tissues from the female mice used in  
515 (A) and (B) (n = 5-7). Data was log-transformed and assessed by unpaired t-test or Mann-  
516 Whitney test (*Fgf21* in Heart). Mean raw C<sub>T</sub> values are shown for wildtype tissues. All data  
517 shown as mean ± SD. Average WT C<sub>T</sub> values listed beneath the graphs.

518 **Fig. 9 Food Intake and bodyweight are reduced in *Wars2*<sup>V117L/V117L</sup> mice.** Cumulative food  
519 intake in (A) males (n = 4-10) and (B) females (n = 8-9 ). N represents 1 cage of 2 mice of the  
520 same genotype. Bodyweight in the same cohort of (C) males (n = 8-20) and (B) females (n =  
521 12-18) where N represents each mouse. Significance at specific time points was calculated with  
522 1-way ANOVA with multiple comparisons. Significance symbols for WT x HET:\*, HET x  
523 HOM:+.

524 **Fig. 10 *Wars2*<sup>V117L/V117L</sup> mice fail to gain fat and lean mass during growth and due to high**  
525 **fat diet feeding.** Three cohorts of 6-month old male (n = 9-18) mice on low-fat (LFD) or high-  
526 fat diet (HFD) were pooled and assessed for body weight (A and B), fat mass (C and D), and  
527 lean mass (E and F), respectively. Genotypes: *Wars2*<sup>+/+</sup> (WT), *Wars2*<sup>+V117L</sup> (HET) and  
528 *Wars2*<sup>V117L/V117L</sup> (HOM). For male mice one homozygote on a LFD and one wildtype on a HFD  
529 were excluded as outliers (identified using ROUT in GraphPad PRISM 9). Significance at  
530 specific time points was calculated with 2-way ANOVA with Tukey's multiple comparison



Muso *et al.* *Wars2* and adiposity

531 analysis for all groups. Significant difference between *Wars2*<sup>+/+</sup> (WT) and *Wars2*<sup>V117L/V117L</sup>  
532 (HOM) is shown as \* p < 0.05, \*\* p < 0.01, \*\*\* p < 0.001. Comparisons between other groups  
533 are depicted in the same way using the symbols (+, &, x, \$, #) annotated in the top right corner.  
534

535 **Fig. 11 *Wars2*<sup>V117L/V117L</sup> mice fail to gain fat and lean mass during growth and due to high**  
536 **fat diet feeding.** Three-cohorts of 6-month old female (n = 11-22) mice on low-fat (LFD) or  
537 high-fat diet (HFD) were pooled and assessed for body weight (A and B), fat mass (C and D),  
538 and lean mass (E and F), respectively. Genotypes: *Wars2*<sup>+/+</sup> (WT), *Wars2*<sup>+V117L</sup> (HET) and  
539 *Wars2*<sup>V117L/V117L</sup> (HOM). Significance at specific time points was calculated with 2-way  
540 ANOVA with Tukey's multiple comparison analysis for all groups within each sex.  
541 Significance between *Wars2*<sup>+/+</sup> (WT) and *Wars2*<sup>V117L/V117L</sup> (HOM) is shown as \* p < 0.05, \*\*  
542 p < 0.01, \*\*\* p < 0.001. Comparisons between other groups are depicted in the same way using  
543 the symbols (+, &, x, \$, #) annotated in the top right corner.

544 **Fig. 12 Gonadal to inguinal WAT (gWAT : iWAT) ratio is elevated in *Wars2*<sup>V117L/V117L</sup>**  
545 **males on a HFD.** gWAT : iWAT ratio was calculated for 6-month old male (n = 9-18) and  
546 female (n = 11-22) mice either on low fat (LFD) and high fat (HFD) diets (A, B). The individual  
547 gWAT (C, D) and iWAT (E, F) weights are shown below. To fit a normal distribution, male  
548 and female gWAT : iWAT ratio data and male iWAT data were transformed by Y = Log<sub>2</sub>(Y).  
549 The gWAT male and female data were normally distributed (D'Agostino & Pearson normality  
550 test) and the iWAT female data showed some deviation from normality (P = 0.0476).  
551 Significance was tested using 2-way ANOVA with Tukey's multiple comparison test between  
552 genotype for each diet. Significant differences in multiple comparisons of WT, HET and HOM  
553 on each diet are depicted as \*p < 0.05, \*\*p < 0.01, \*\*\*p < 0.001.

554

555
